# Supplementary material
Source: PubMed Central journal article supplement (PMC6672038)

**Figure S2:** Release of **a)** 2-AG and **b)** 1-AG during the incubation of plasma that was acidified to pH 4.7 and pH 3.8, respectively. Analytes were extracted and quantified in one replicate after the indicated incubation time.

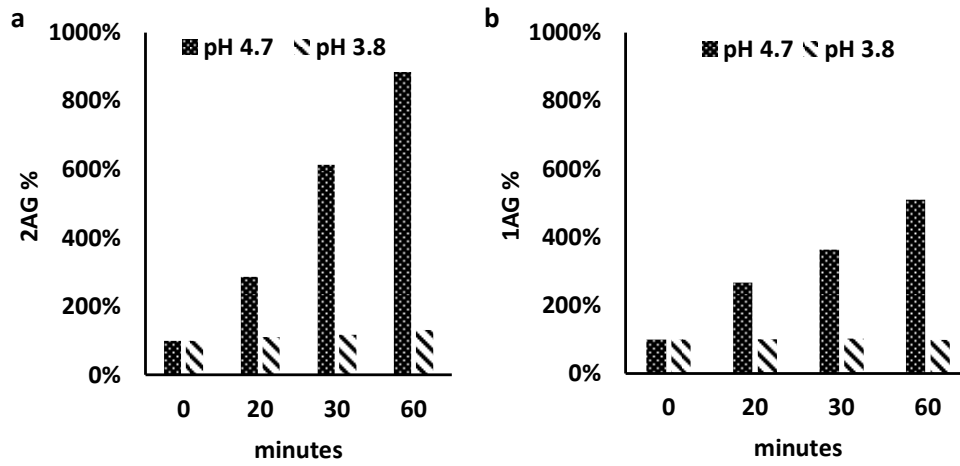

Supplement: 10.1194_D094680_jlr.D094680-2.pdf [file 10.1194_D094680_jlr.D094680-2.pdf]
