# Supplementary material
Source: PubMed Central journal article supplement (PMC6672038)
Supplement: 10.1194_D094680_jlr.D094680-5.pdf [file 10.1194_D094680_jlr.D094680-5.pdf]

**Table S3:** Stability of endogenous glycerol esters and representative fatty acid ethanolamides during storage at  $-80\text{ }^{\circ}\text{C}$ . Concentrations were determined in triplicate and tested with one-way ANOVA and Bonferroni's post hoc test. Significant changes with  $p < 0.05$  are presented in a dashed box. Time-dependent changes in analyte concentrations are presented in percent relative to its value on time point zero.

| (n = 3)         | time (days)     |     |     |     |
|-----------------|-----------------|-----|-----|-----|
|                 | 0               | 7   | 35  | 56  |
|                 | <b>2-AG (%)</b> |     |     |     |
| pH 5.8          | 100             | 96  | 100 | 82  |
| pH 4.7          | 100             | 88  | 104 | 85  |
| 0.5 KSCN pH 4.7 | 100             | 92  | 114 | 80  |
|                 | <b>1-AG (%)</b> |     |     |     |
| pH 5.8          | 100             | 103 | 110 | 98  |
| pH 4.7          | 100             | 117 | 93  | 86  |
| 0.5 KSCN pH 4.7 | 100             | 102 | 72  | 87  |
|                 | <b>2-LG (%)</b> |     |     |     |
| pH 5.8          | 100             | 93  | 90  | 71  |
| pH 4.7          | 100             | 90  | 93  | 64  |
| 0.5 KSCN pH 4.7 | 100             | 82  | 61  | 50  |
|                 | <b>1-LG (%)</b> |     |     |     |
| pH 5.8          | 100             | 87  | 95  | 98  |
| pH 4.7          | 100             | 78  | 114 | 86  |
| 0.5 KSCN pH 4.7 | 100             | 65  | 96  | 87  |
|                 | <b>2-OG (%)</b> |     |     |     |
| pH 5.8          | 100             | 82  | 67  | 57  |
| pH 4.7          | 100             | 79  | 77  | 58  |
| 0.5 KSCN pH 4.7 | 100             | 93  | 65  | 55  |
|                 | <b>PEA (%)</b>  |     |     |     |
| pH 5.8          | 100             | 89  | 105 | 98  |
| pH 4.7          | 100             | 95  | 97  | 107 |
| 0.5 KSCN pH 4.7 | 100             | 102 | 93  | 125 |
|                 | <b>OEA (%)</b>  |     |     |     |
| pH 5.8          | 100             | 94  | 127 | 132 |
| pH 4.7          | 100             | 94  | 113 | 129 |
| 0.5 KSCN pH 4.7 | 100             | 107 | 109 | 128 |
|                 | <b>AEA (%)</b>  |     |     |     |
| pH 5.8          | 100             | 96  | 108 | 100 |
| pH 4.7          | 100             | 90  | 95  | 111 |
| 0.5 KSCN pH 4.7 | 100             | 92  | 96  | 105 |
