# Supplementary material
Source: PubMed Central journal article supplement (PMC6672038)
Supplement: 10.1194_D094680_jlr.D094680-6.pdf [file 10.1194_D094680_jlr.D094680-6.pdf]

**Table S4:** Influence of matrix on electrospray ionization efficiency of isotope labelled standards (IS) in plasma and NAPE extracts (Matrix effect, %), and total recovery of spiked IS from all tested matrices. To assess the matrix effect, extracts of pooled plasma were re-dissolved with methanol/water (70:30 v/v) containing IS. Values indicate the observed changes in percent relative to pure IS response. Total recovery of IS from six independent plasma and NAPE extracts was assessed by spiking IS prior to extraction and incubation, respectively. Recovery of IS from 2-AG-PI extracts was assessed by spiking IS after incubation. Values are expressed relative to pure IS.

|         | Matrix effect (%)                               |     |      |                    |     |      | Total recovery of spiked IS (%) |         |         |
|---------|-------------------------------------------------|-----|------|--------------------|-----|------|---------------------------------|---------|---------|
|         | Plasma extract (n=3)                            |     |      | NAPE extract (n=3) |     |      | (n=6)                           |         |         |
|         | Concentration of IS spiked after plasma work up |     |      |                    |     |      |                                 |         |         |
|         | Low                                             | Med | High | Low                | Med | High | Plasma                          | NAPE    | 2-AG-PI |
| PEAd4   | -6                                              | -2  | -2   | 14                 | -4  | 29   | 87 ± 9                          | 97 ± 4  | -       |
| SEAd4   | -15                                             | 1   | 11   | 16                 | -6  | 21   | 99 ± 22                         | 105 ± 5 | -       |
| POEAd4  | -7                                              | -8  | -5   | 18                 | -2  | 29   | 86 ± 4                          | 100 ± 4 | -       |
| OEAd4   | -10                                             | -4  | -1   | 16                 | -6  | 28   | 78 ± 10                         | 95 ± 2  | -       |
| LEAd4   | -7                                              | -6  | -6   | 11                 | -7  | 21   | 85 ± 7                          | 96 ± 5  | -       |
| AEAd8   | -8                                              | -8  | -4   | 10                 | -5  | 25   | 93 ± 7                          | 92 ± 6  | -       |
| 2-AGd8  | -19                                             | -11 | -15  | 03                 | -23 | 06   | 77 ± 10                         | 0       | 73 ± 9  |
| NAGlyd8 | -10                                             | -11 | -8   | 19                 | -18 | 17   | 84 ± 4                          | 78 ± 4  | -       |
