# Supplementary material
Source: PubMed Central journal article supplement (PMC6672038)
Supplement: 10.1194_D094680_jlr.D094680-7.pdf [file 10.1194_D094680_jlr.D094680-7.pdf]

**Table S5:** Linearity of calibration curves in solvent and in spiked matrix, determined in three replicates.

| <i>f(x)</i> | Solvent (n = 3) |       |                | Spiked Matrix (n = 3) |       |                | Concentration range (ng/ml) |
|-------------|-----------------|-------|----------------|-----------------------|-------|----------------|-----------------------------|
|             | y               | x     | R <sup>2</sup> | y                     | x     | R <sup>2</sup> |                             |
| 2-AG (1)    | 0.003           | 0.221 | 0.997          | 0.007                 | 0.219 | 0.999          | 0.08 - 5                    |
| 2-AG (2)    | 0.006           | 0.129 | 0.995          | 0.002                 | 0.127 | 0.997          |                             |
| 2-LG (1)    | 0.002           | 0.106 | 0.999          | 0.013                 | 0.108 | 0.999          | 0.16 - 40                   |
| 2-LG (2)    | 0.000           | 0.063 | 0.999          | 0.021                 | 0.104 | 0.996          |                             |
| 2-OG (1)    | 0.006           | 0.079 | 0.996          | 0.031                 | 0.075 | 0.990          | 0.16 - 60                   |
| 2-OG (2)    | 0.014           | 0.072 | 0.999          | 0.005                 | 0.067 | 0.986          |                             |
| NE (1)      | 0.003           | 0.282 | 0.997          | 0.002                 | 0.283 | 0.996          | 0.02 - 1.25                 |
| NE (2)      | 0.000           | 0.081 | 0.996          | -0.007                | 0.074 | 0.980          |                             |
| NAGly (1)   | 0.001           | 0.094 | 0.999          | 0.001                 | 0.105 | 0.998          | 0.04 - 2.5                  |
| NAGly (2)   | 0.001           | 0.039 | 0.997          | 0.003                 | 0.054 | 0.995          |                             |
| PEA (1)     | 0.024           | 0.710 | 0.998          | 0.045                 | 0.703 | 0.999          | 0.08 - 8                    |
| PEA (2)     | 0.002           | 0.047 | 0.997          | 0.000                 | 0.047 | 0.998          |                             |
| SEA (1)     | 0.021           | 0.750 | 0.998          | 0.042                 | 0.713 | 0.989          | 0.016 - 4                   |
| SEA (2)     | -0.106          | 0.048 | 0.999          | 0.002                 | 0.043 | 0.987          |                             |
| POEA (1)    | 0.001           | 6.557 | 0.999          | 0.033                 | 6.416 | 0.998          | 0.008 - 0.5                 |
| POEA (2)    | 0.002           | 0.472 | 0.998          | 0.034                 | 0.525 | 0.972          |                             |
| OEA (1)     | 0.004           | 0.388 | 0.996          | 0.023                 | 0.405 | 0.999          | 0.08 - 8                    |
| OEA (2)     | 0.000           | 0.027 | 0.995          | 0.000                 | 0.028 | 0.998          |                             |
| VEA (1)     | 0.001           | 0.354 | 0.998          | 0.026                 | 0.391 | 0.999          | 0.08 - 8                    |
| VEA (2)     | 0.000           | 0.025 | 0.996          | 0.002                 | 0.028 | 0.997          |                             |
| tVEA (1)    | 0.000           | 0.517 | 0.997          | 0.002                 | 0.572 | 0.994          | 0.008 - 0.5                 |
| tVEA (2)    | 0.000           | 0.037 | 0.994          | 0.001                 | 0.037 | 0.983          |                             |
| EEA (1)     | -0.002          | 0.423 | 0.998          | 0.000                 | 0.499 | 0.996          | 0.008 - 0.5                 |
| EEA (2)     | 0.000           | 0.029 | 0.989          | 0.000                 | 0.030 | 0.982          |                             |
| tPeEA (1)   | -0.001          | 0.367 | 0.999          | 0.002                 | 0.322 | 0.996          | 0.008 - 0.5                 |
| tPeEA (2)   | 0.000           | 0.027 | 0.990          | 0.000                 | 0.024 | 0.991          |                             |
| AEA (1)     | 0.008           | 2.810 | 0.997          | 0.043                 | 2.904 | 0.999          | 0.04 - 2.5                  |
| AEA (2)     | 0.009           | 1.038 | 0.998          | 0.010                 | 1.032 | 0.999          |                             |
| ETEA (1)    | -0.001          | 2.512 | 0.999          | 0.008                 | 2.546 | 0.999          | 0.008 - 0.5                 |
| ETEA (2)    | 0.004           | 0.389 | 0.995          | 0.000                 | 0.389 | 0.991          |                             |
| EPEA (1)    | -0.001          | 1.868 | 0.995          | 0.003                 | 1.886 | 0.999          | 0.008 - 0.5                 |
| EPEA (2)    | 0.001           | 0.912 | 0.998          | -0.012                | 0.932 | 0.994          |                             |
| DHEA (1)    | -0.002          | 2.637 | 0.998          | 0.009                 | 2.607 | 0.998          | 0.02 - 1.25                 |
| DHEA (2)    | -0.006          | 1.684 | 0.998          | 0.005                 | 1.635 | 0.998          |                             |
| ALEA (1)    | 0.000           | 0.632 | 0.999          | -0.001                | 0.676 | 0.998          | 0.008 - 0.5                 |
| ALEA (2)    | 0.000           | 0.082 | 0.994          | 0.000                 | 0.093 | 0.980          |                             |
| GLEA (1)    | 0.001           | 0.636 | 0.999          | 0.000                 | 0.681 | 0.999          | 0.008 - 0.5                 |
| GLEA (2)    | 0.001           | 0.166 | 0.997          | 0.000                 | 0.191 | 0.990          |                             |
| LEA (1)     | -0.005          | 1.315 | 0.998          | 0.023                 | 1.373 | 0.999          | 0.04 - 2.5                  |
| LEA (2)     | 0.001           | 0.091 | 0.997          | -0.006                | 0.095 | 0.994          |                             |
| DALEA (1)   | 0.000           | 0.687 | 0.997          | 0.002                 | 0.738 | 0.998          | 0.008 - 0.5                 |
| DALEA (2)   | -0.001          | 0.089 | 0.991          | 0.000                 | 0.076 | 0.987          |                             |
| DGLEA (1)   | -0.001          | 0.835 | 0.998          | 0.003                 | 0.864 | 0.995          | 0.008 - 0.5                 |
| DGLEA (2)   | -0.001          | 0.115 | 0.990          | -0.002                | 0.117 | 0.987          |                             |
